# Supplementary material for: Palmitic Acid Impedes Extravillous Trophoblast Activity by Increasing MRP1 Expression and Function
Source: Preprints.org preprint supplement (doi:10.20944/preprints202208.0073.v1), 2022-08-03

Figure S1: Expression of ABC transporters and effect of linoleic and palmitic acids in the placental cell lines. Expression of BCRP (A), PgP (B), MRP1 (C) and MRP7 (D) in the placental cell lines determined by western blotting. MRP1 expression in JEG-3 (E) and BeWo (F) cells after exposure to 0.5 mM palmitic acid for 0-72 h. MRP1 expression in JEG-3 (G), HTR-8/SVneo (H), Swan-71 (I) and BeWo (J) cells after exposure to 1 mM linoleic acid for 0-72 h.

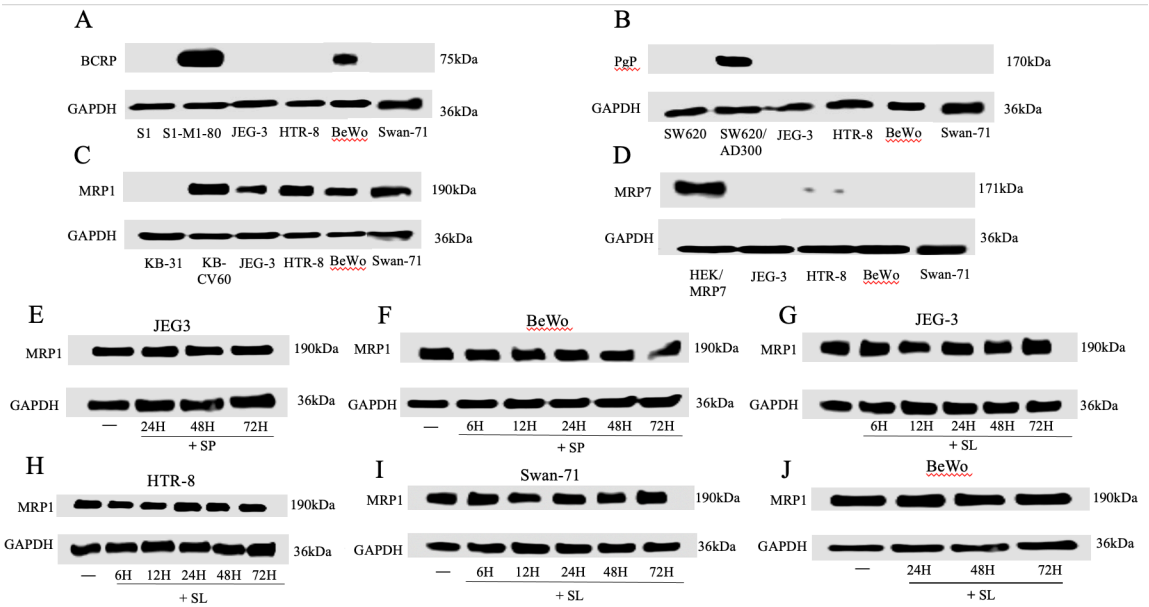

Supplement: Supplementary file 1 [file supplementary]
